# Supplementary material for: Convergent reductive evolution of cyanobacteria in symbiosis with Dinophysiales dinoflagellates
Source: bioRxiv or medRxiv preprint supplement (doi:10.1101/2024.01.11.574452), 2024-01-11
Supplement: Supplementary file [file media-1.pdf]

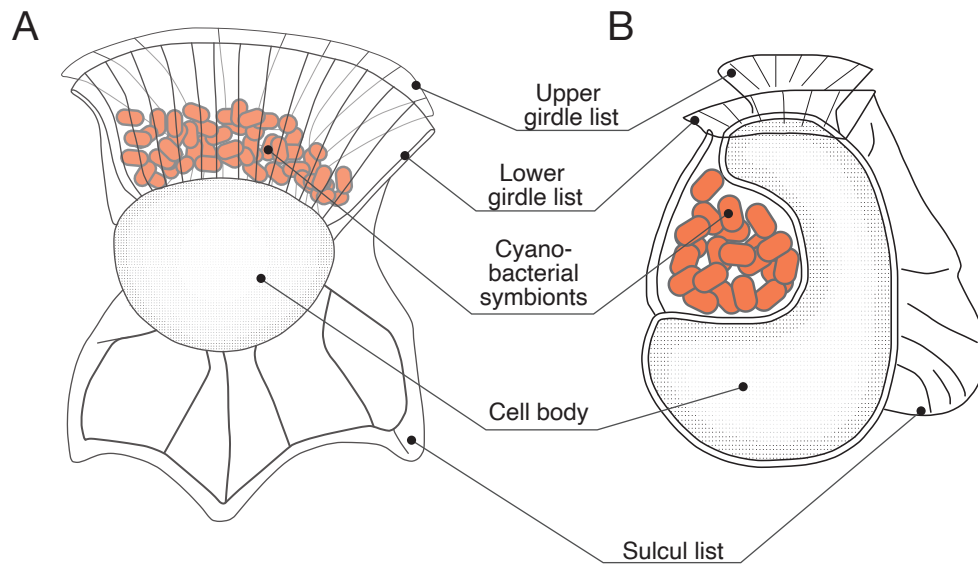

**Figure S1.** Schematic drawing of the morphology of *Ornithocercus magnificus* (A) and *Citharistes regius* (B).
